# Supplementary material
Source: PubMed Central journal article supplement (PMC7901056)
Supplement: fig-s1-5_taaa217.pdf [file fig-s1-5_taaa217.pdf]

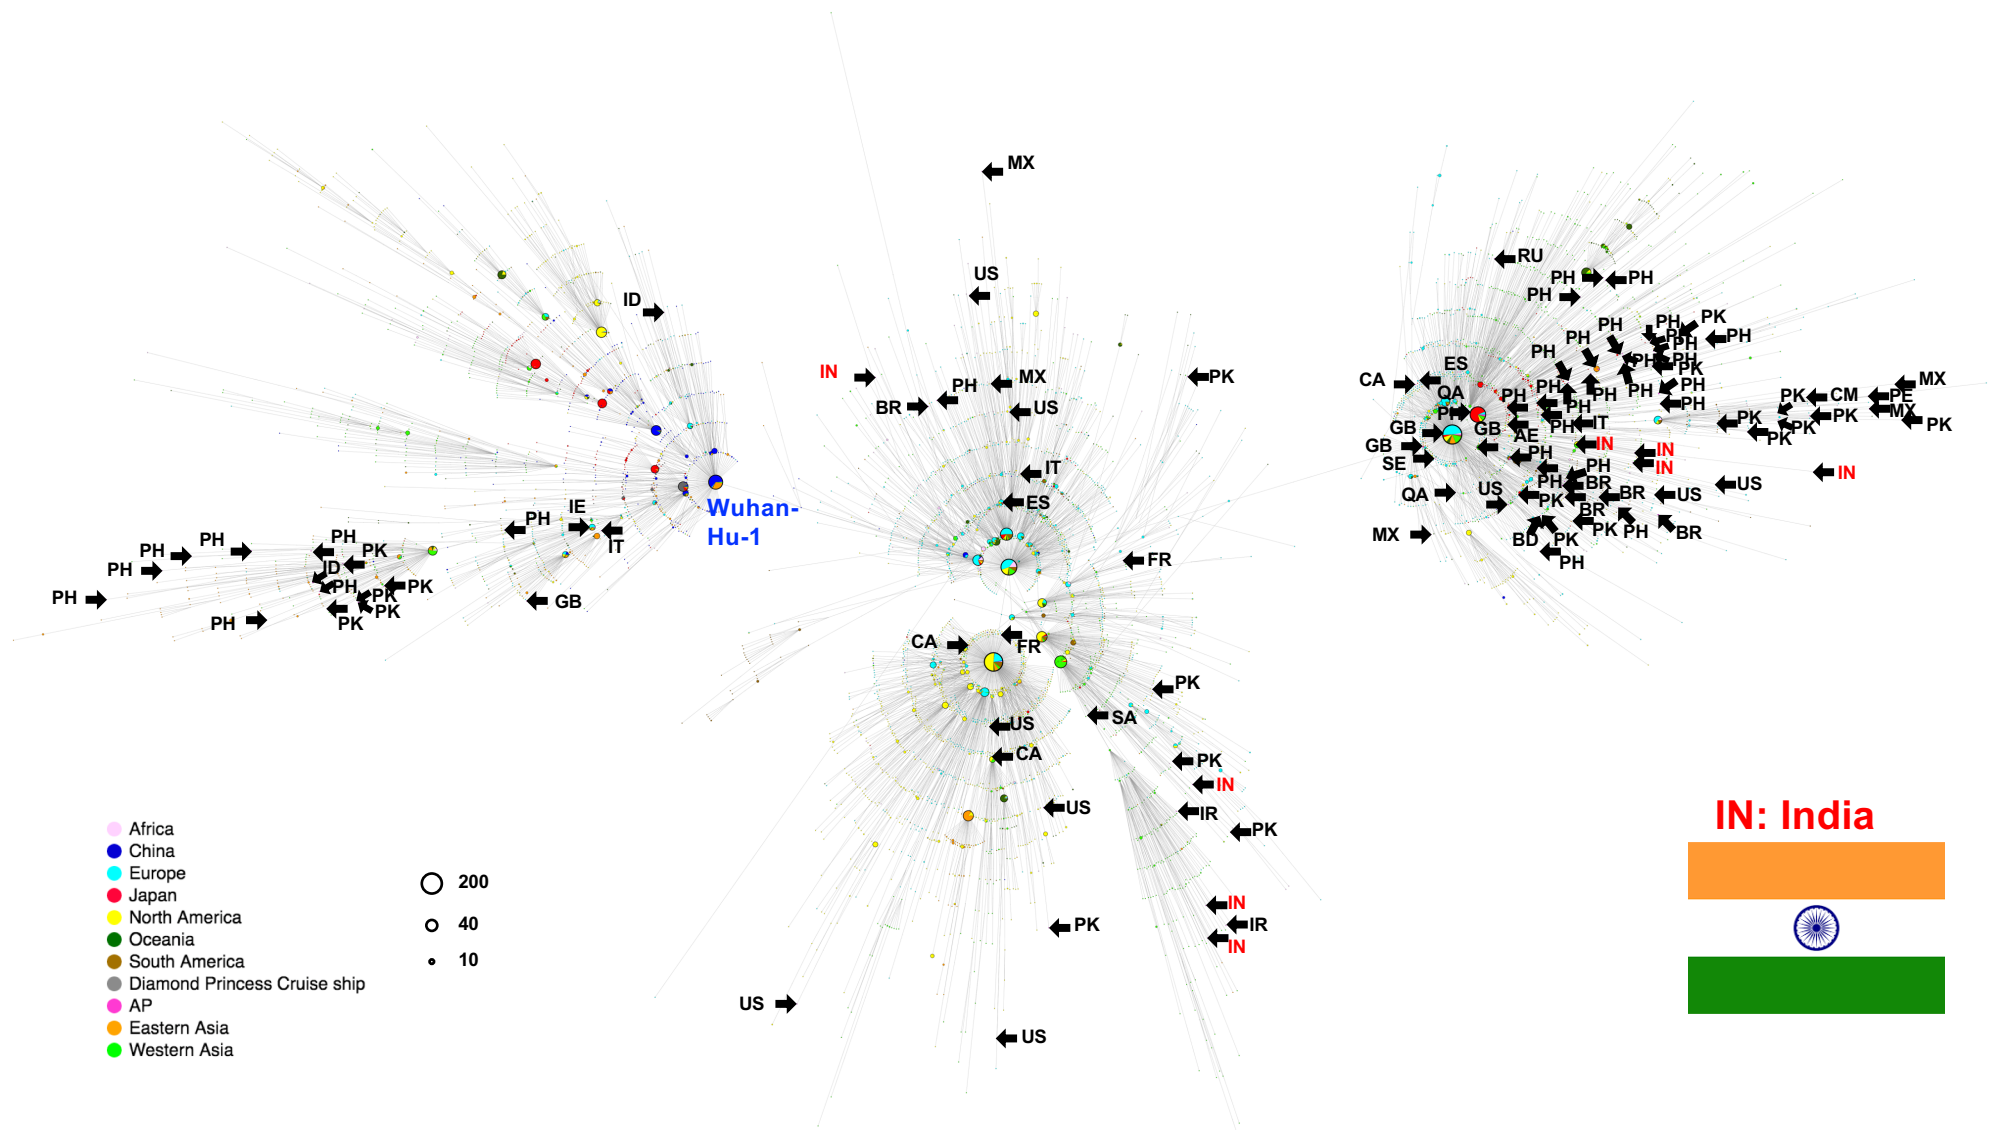

**Supplementary Figure S1-5**

Haplotype network analysis using genome-wide single-nucleotide variations of SARS-CoV-2 isolates by highlighting with country-specific (S1-5, India). COVID-19, coronavirus disease
